# Supplementary material
Source: MDPI journal article supplement (https://www.mdpi.com/2073-4395/12/11/2855)
Supplement: s1 [file s1]

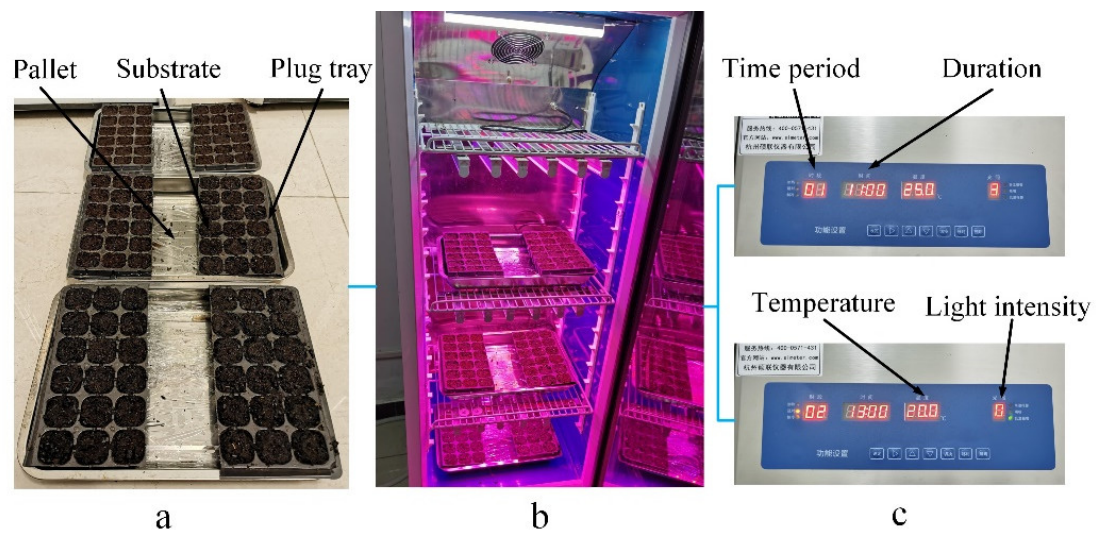

**Supplementary Figure S1.** The cultivation of the seedlings before transplanting: (a) The plug trays filled with substrate; (b) The incubator; (c) The parameter setting of the incubator.

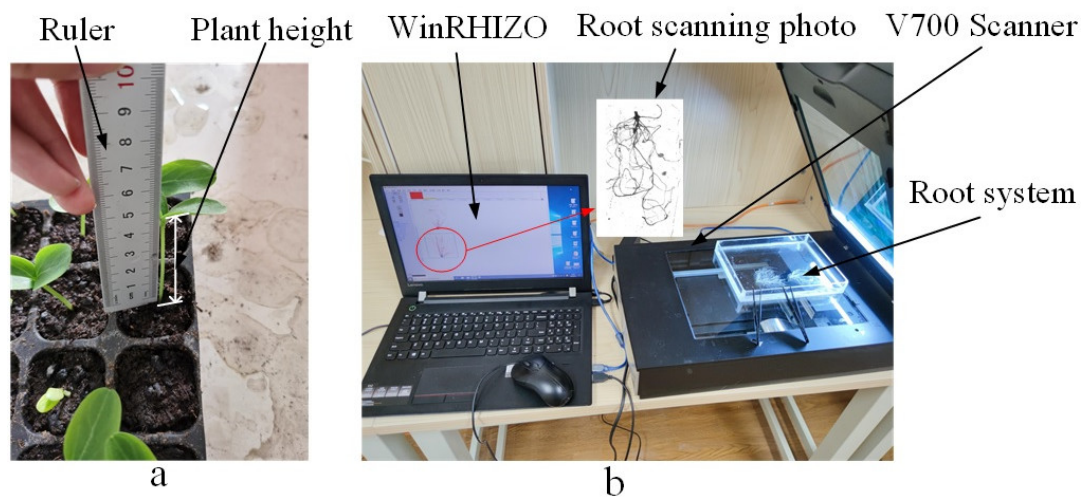

**Supplementary Figure S2.** The measurement of plant height and total root length: **(a)** Measurement of plant height; **(b)** Measurement of total root length.

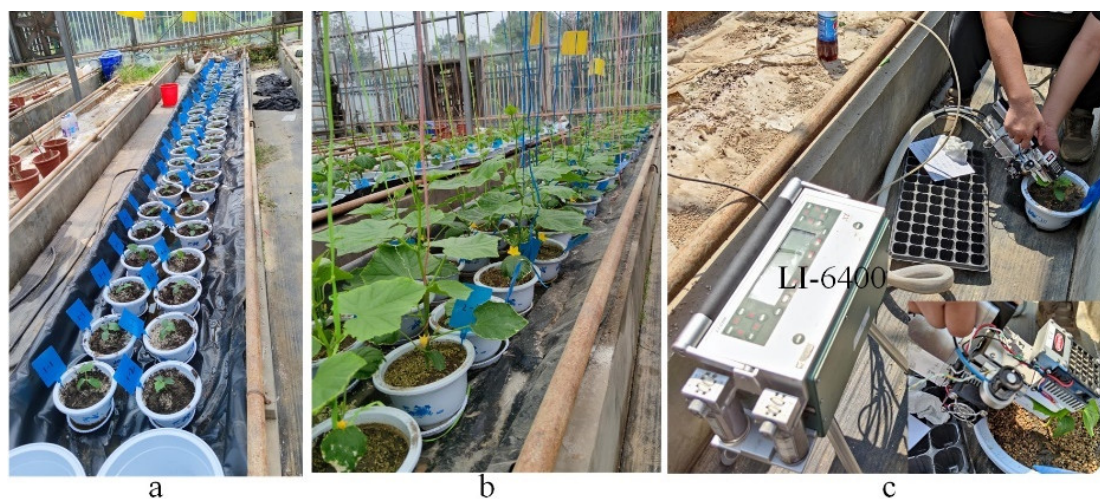

**Supplementary Figure S3.** The cultivation of the seedlings after transplanting: (a) Seedlings transplanted into the flowerpot; (b) Seedlings cultivated to flowering stage; (c) The measurement of leaf gas exchange parameters.

**Supplementary Table S1.** The implication of 27 numbers and CK on x-axis in the Figure.

| Numbers | Biochar rate | Water content | N-fertilization |
|---------|--------------|---------------|-----------------|
| 1       | 5%           | 80%           | 0%              |
| 2       | 5%           | 65%           | 0%              |
| 3       | 5%           | 50%           | 0%              |
| 4       | 5%           | 80%           | 50%             |
| 5       | 5%           | 65%           | 50%             |
| 6       | 5%           | 50%           | 50%             |
| 7       | 5%           | 80%           | 100%            |
| 8       | 5%           | 65%           | 100%            |
| 9       | 5%           | 50%           | 100%            |
| 10      | 10%          | 80%           | 0%              |
| 11      | 10%          | 65%           | 0%              |
| 12      | 10%          | 50%           | 0%              |
| 13      | 10%          | 80%           | 50%             |
| 14      | 10%          | 65%           | 50%             |
| 15      | 10%          | 50%           | 50%             |
| 16      | 10%          | 80%           | 100%            |
| 17      | 10%          | 65%           | 100%            |
| 18      | 10%          | 50%           | 100%            |
| 19      | 15%          | 80%           | 0%              |
| 20      | 15%          | 65%           | 0%              |
| 21      | 15%          | 50%           | 0%              |
| 22      | 15%          | 80%           | 50%             |
| 23      | 15%          | 65%           | 50%             |
| 24      | 15%          | 50%           | 50%             |
| 25      | 15%          | 80%           | 100%            |
| 26      | 15%          | 65%           | 100%            |
| 27      | 15%          | 50%           | 100%            |
| CK      | 0%           | 100%          | 0%              |
